# Supplementary material for: WhatsApp embedded in routine service delivery for smoking cessation: effects on abstinence rates in a randomized controlled study
Source: PubMed Central journal article supplement (PMC6454636; doi:10.1186/s12889-019-6727-z), 2019-04-08
Supplement: 12889_2019_6727_MOESM2_ESM.pdf [file 12889_2019_6727_MOESM2_ESM.pdf]

**Additional file 2.** The detailed random allocation sequence

| Monday |           |        |       | Tuesday |           |        |       | Wednesday |           |        |       | Thursday |           |        |       | Friday |           |        |       |
|--------|-----------|--------|-------|---------|-----------|--------|-------|-----------|-----------|--------|-------|----------|-----------|--------|-------|--------|-----------|--------|-------|
| Rank   | Physician | Gender | Group | Rank    | Physician | Gender | Group | Rank      | Physician | Gender | Group | Rank     | Physician | Gender | Group | Rank   | Physician | Gender | Group |
| 1      | A         | F      | I     | 1       | B         | F      | I     | 1         | C         | F      | K     | 1        | D         | F      | I     | 1      | E         | F      | K     |
| 2      | A         | F      | K     | 2       | B         | F      | I     | 2         | C         | F      | K     | 2        | D         | F      | K     | 2      | E         | F      | I     |
| 3      | A         | F      | K     | 3       | B         | F      | I     | 3         | C         | F      | I     | 3        | D         | F      | K     | 3      | E         | F      | K     |
| 4      | A         | F      | K     | 4       | B         | F      | K     | 4         | C         | F      | K     | 4        | D         | F      | K     | 4      | E         | F      | I     |
| 5      | A         | F      | K     | 5       | B         | F      | K     | 5         | C         | F      | I     | 5        | D         | F      | I     | 5      | E         | F      | I     |
| 6      | A         | F      | K     | 6       | B         | F      | K     | 6         | C         | F      | K     | 6        | D         | F      | K     | 6      | E         | F      | K     |
| 7      | A         | F      | K     | 7       | B         | F      | I     | 7         | C         | F      | K     | 7        | D         | F      | K     | 7      | E         | F      | K     |
| 8      | A         | F      | I     | 8       | B         | F      | K     | 8         | C         | F      | K     | 8        | D         | F      | I     | 8      | E         | F      | I     |
| 9      | A         | F      | K     | 9       | B         | F      | K     | 9         | C         | F      | I     | 9        | D         | F      | K     | 9      | E         | F      | K     |
| 10     | A         | F      | I     | 10      | B         | F      | K     | 10        | C         | F      | K     | 10       | D         | F      | K     | 10     | E         | F      | K     |
| 11     | A         | F      | I     | 11      | B         | F      | K     | 1         | C         | M      | K     | 1        | D         | M      | I     | 1      | E         | M      | K     |
| 1      | A         | M      | K     | 1       | B         | M      | K     | 2         | C         | M      | K     | 2        | D         | M      | K     | 2      | E         | M      | K     |
| 2      | A         | M      | K     | 2       | B         | M      | I     | 3         | C         | M      | K     | 3        | D         | M      | K     | 3      | E         | M      | K     |
| 3      | A         | M      | I     | 3       | B         | M      | K     | 4         | C         | M      | I     | 4        | D         | M      | K     | 4      | E         | M      | I     |
| 4      | A         | M      | K     | 4       | B         | M      | K     | 5         | C         | M      | I     | 5        | D         | M      | K     | 5      | E         | M      | K     |
| 5      | A         | M      | I     | 5       | B         | M      | K     | 6         | C         | M      | K     | 6        | D         | M      | K     | 6      | E         | M      | K     |
| 6      | A         | M      | K     | 6       | B         | M      | I     | 7         | C         | M      | I     | 7        | D         | M      | K     | 7      | E         | M      | K     |
| 7      | A         | M      | K     | 7       | B         | M      | K     | 8         | C         | M      | K     | 8        | D         | M      | K     | 8      | E         | M      | I     |
| 8      | A         | M      | K     | 8       | B         | M      | K     | 9         | C         | M      | I     | 9        | D         | M      | K     | 9      | E         | M      | K     |
| 9      | A         | M      | K     | 9       | B         | M      | K     | 10        | C         | M      | K     | 10       | D         | M      | I     | 10     | E         | M      | K     |
| 10     | A         | M      | I     | 10      | B         | M      | K     | 11        | C         | M      | K     | 11       | D         | M      | K     | 11     | E         | M      | K     |
| 11     | A         | M      | K     | 11      | B         | M      | K     | 12        | C         | M      | K     | 12       | D         | M      | K     | 12     | E         | M      | I     |
| 12     | A         | M      | K     | 12      | B         | M      | K     | 13        | C         | M      | K     | 13       | D         | M      | I     | 13     | E         | M      | I     |
| 13     | A         | M      | I     | 13      | B         | M      | I     | 14        | C         | M      | K     | 14       | D         | M      | I     | 14     | E         | M      | K     |
| 14     | A         | M      | K     | 14      | B         | M      | I     | 15        | C         | M      | K     | 15       | D         | M      | K     | 15     | E         | M      | I     |
| 15     | A         | M      | K     | 15      | B         | M      | I     | 16        | C         | M      | I     | 16       | D         | M      | I     | 16     | E         | M      | I     |
| 16     | A         | M      | I     | 16      | B         | M      | K     |           |           |        |       |          |           |        |       |        |           |        |       |

Example 1: On Tuesday the first female individual to meet with Dr. B will be distributed to the Intervention (I) group and first male individual to the Control (K) group. Dr. B does not know about the allocation.

Example 2: On Thursday the first individual to meet with Dr. D will be distributed to the Intervention (I) group for both sexes. Dr. D does not know about the allocation.
