# Supplementary material for: WhatsApp embedded in routine service delivery for smoking cessation: effects on abstinence rates in a randomized controlled study
Source: Springer Nature journal article supplement (doi:10.1186/s12889-019-6727-z), 2019-04-08
Supplement: MOESM3 [file 16629782]

### **Additional file 3.** Some characteristics of participants

|                                     | Mean  | Std. Deviation |
|-------------------------------------|-------|----------------|
| Age (n=132)                         | 39.27 | 12.12          |
| Daily cigarette consumption (n=132) | 22.58 | 10.07          |
| Number of quit attempts (n=109)     | 2.60  | 1.78           |
| Addiction score (n=132)             | 5.69  | 2.24           |
| Depression score (n=130)            | 5.89  | 3.67           |
| CO (n=132)                          | 20.87 | 11.33          |
